# Supplementary material for: Non-canonical Drosophila X chromosome dosage compensation and repressive topologically associated domains
Source: PubMed Central journal article supplement (PMC6199721; doi:10.1186/s13072-018-0232-y), 2018-10-24

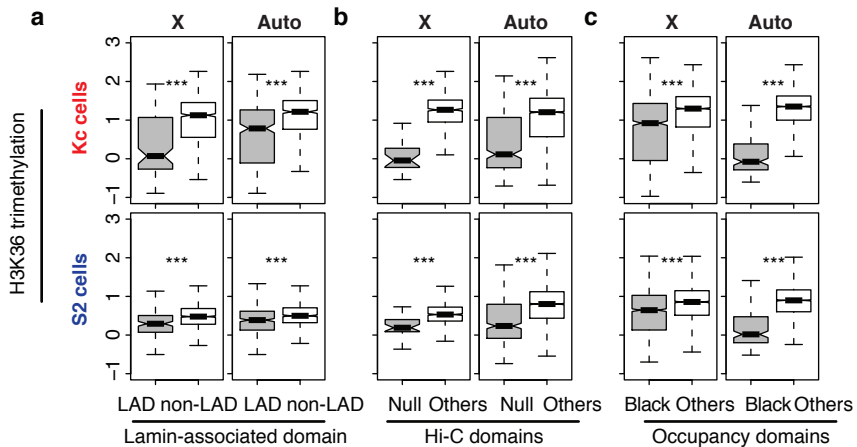

Supplement: 13072_2018_232_MOESM2_ESM.pdf [file 13072_2018_232_MOESM2_ESM.pdf]
